# Supplementary material
Source: PubMed Central journal article supplement (PMC6416416)
Supplement: supp_RA118.005419_140194_2_supp_266953_pl6rtf.pdf [file supp_RA118.005419_140194_2_supp_266953_pl6rtf.pdf]

Supporting Information for

**Biochemical and structural analyses suggest that plasminogen activators coevolved with their cognate protein substrates and inhibitors**

Agnieszka Jendroszek, Jeppe B. Madsen, Andrés Chana-Muñoz, Daniel M. Dupont, Anni Christensen, Frank Panitz, Ernst-Martin Füchtbauer, Simon C. Lovell, and Jan K. Jensen

|                                                                                                      |    |
|------------------------------------------------------------------------------------------------------|----|
| Figure S1. Sequence of expressed wt huPlg and wt zfuPlg                                              | S2 |
| Figure S2. Sensograms representing binding of hPAI-1 and zfPAI-1 variants to huPA and zfuPA variants | S3 |
| Figure S3. Plasminogen activation followed by SDS-PAGE                                               | S4 |

### A) Full-length plasminogen

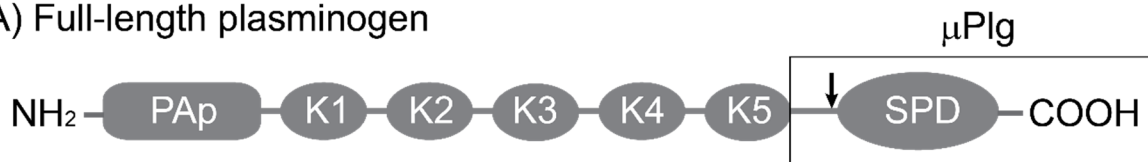

### B) Sequence of hμPlg

MASMTGGQQMGRGSPGRVAAPSFDCGKQVEPKKCPGRVVGGCVAHPHSWPWQVSLRTRFGM  
HFCGGTLISPEWVLTAAHCLERSDSPSAYKIMLGIIHITERATESKQERDVTKIIKGPAGTDIAL  
ALLKLSSPAVITDKVIPACLPSPNYVVADRTECFVTGWGETQDTGEGYLNKQVLPVIENKVCN  
CNRYEFLNGRVQSTELCAGHLAGGTDSCQGDGGPLVCFEAKDKYILQGVTSWGLGCARPKNK  
GVYVRSRFRVTVWIEGVMRNN

### C) Sequence of zfμplg

MASMTGGQQMGRGSPGRVESLKCGQPATKPKRCFGRIVGGCVSKPHSWPWQISLRTRGKIHF  
CGGTLIDPQWVVTAAHCLERSDSPSAYKIMLGIIHITERATESKQERDVTKIIKGPAGTDIAL  
LKLDRPALINDKVPVCLPEKDYIVPSNTECYVTGWGETQDTGEGYLNKQVLPVIENKVCN  
RPSFLNGRVKDHEMCAGNIEGGNDSCQGDGGPLVCFEAKDKYILQGVTSWGLGCANAMKPGV  
YTRVSKFVDWIERSIKEN

**Figure S1.** Sequence of expressed wt huPlg and wt zfuPlg. A) shows the schematic of the plasminogen domain architecture. The domain nomenclature is: Pan-apple domain, PAp; kringles 1 to 5, K1 to K5 and serine protease domain, SPD. B) protein sequence of the produced human μPlg. C) protein sequence of the produced zebrafish μPlg. In both B) and C) the peptide facilitating expression in inclusion bodies is highlighted in gray, the linker connecting the SPD and K5 is underlined. The activation loop is located between the two Cys residues marked with boxes with the scissile bond shown with an arrow.

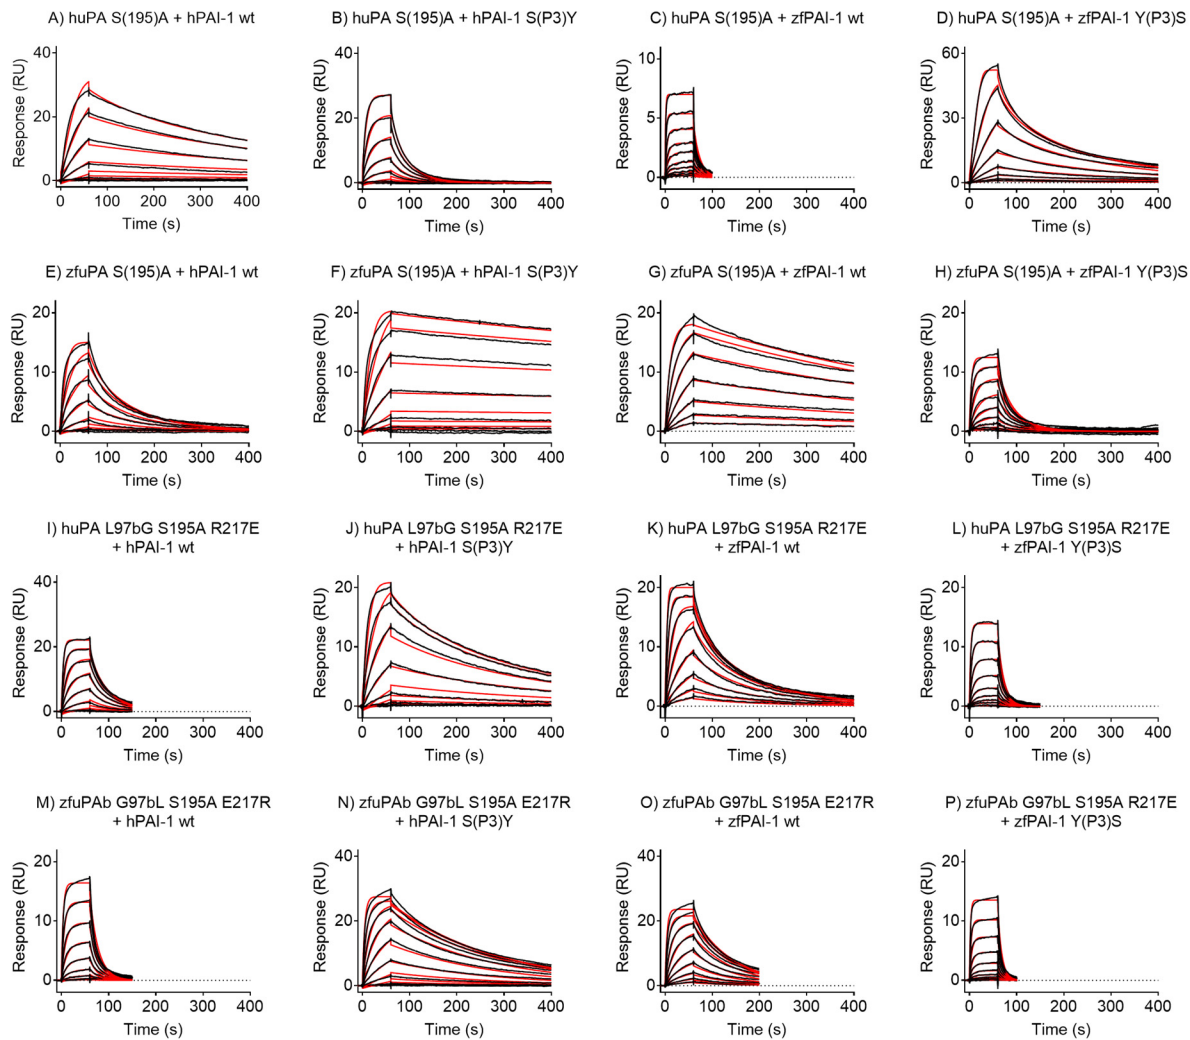

**Figure S2.** Sensograms representing binding of hPAI-1 and zfPAI-1 variants to huPA S195A (A-D), zfPAI-1 S195A (E-H), huPA L97bG S195A R217E (I-L) and zfuPA G97bL S195A E217R (M-P). Representative raw data of the concentration series is shown in black with the corresponding global fit to the 1:1 binding model given in red. X-axis is kept constant to enable the quick comparison of relative rate constant.

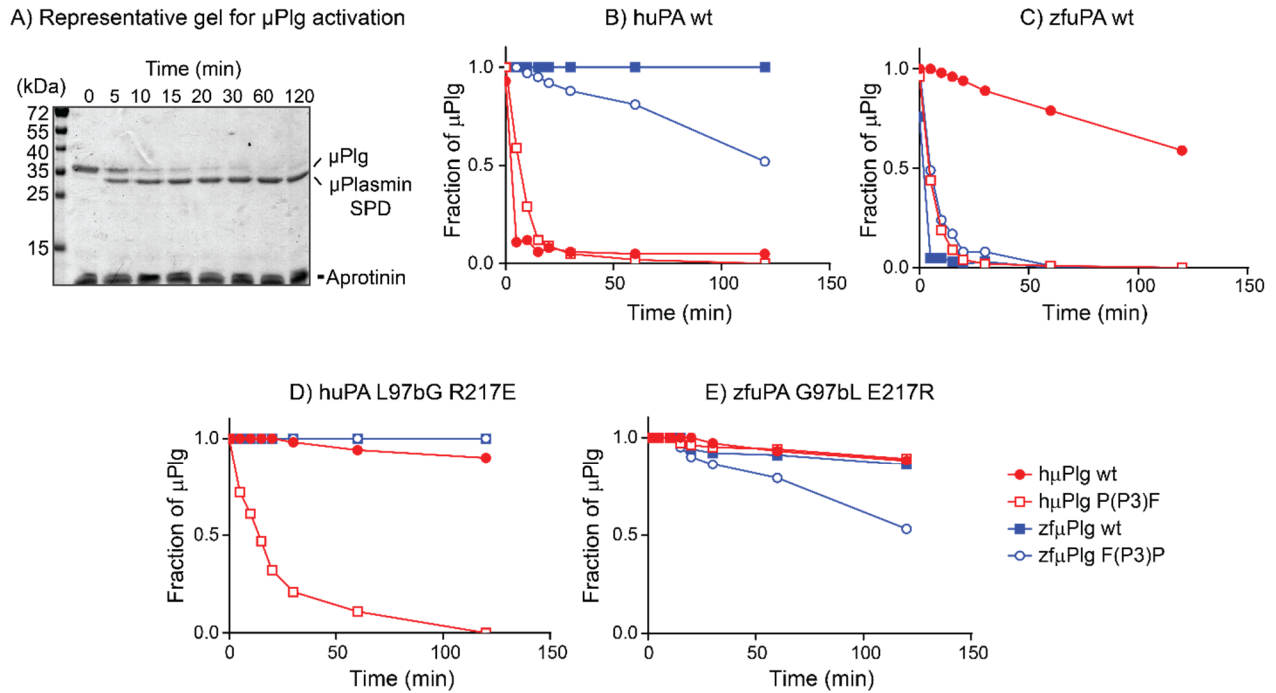

**Figure S3.** Plasminogen activation followed by SDS-PAGE. A) The representative gel of plasminogen activation. For each tested uPA variant: huPA wt (B); zfuPA wt (C); huPA L97bG R217E (D) and zfuPA G97bL E217R (E) the intensity of band referring to  $\mu$ Plg was measured and plotted against the time.
